# Supplementary material for: Phase transition behaviour and mechanism of 2D TiO2(B) nanosheets through water-mediated removal of surface ligands
Source: Royal Society of Chemistry journal article supplement (doi:10.1039/d3dt02752j), 2023-01-01
Supplement: d3dt02752j1.pdf [file d3dt02752j1.pdf]

## Supplementary Information

### Phase Transition Behaviour and Mechanism of 2D TiO<sub>2</sub>(B) Nanosheets through Water-mediated Removal of Surface Ligands

Shirui Xie,<sup>a</sup> Lijing Fan,<sup>a</sup> Yanxin Chen,<sup>a</sup> Jiliang Cai,<sup>a</sup> Fan Wu,<sup>a</sup> Kecheng Cao<sup>\*a</sup> and Pengxin Liu<sup>\*a</sup>

#### Directory

|                                                                                             |                    |
|---------------------------------------------------------------------------------------------|--------------------|
| Characterization of the TiO <sub>2</sub> (B) nanosheets precursor.....                      | <b>Fig. S1-3</b>   |
| Characterization of calcined TiO <sub>2</sub> (B).....                                      | <b>Fig. S4-6</b>   |
| Characterization of water phase-treated TiO <sub>2</sub> (B).....                           | <b>Fig. S7-12</b>  |
| Pretreated TiO <sub>2</sub> (B) nanosheets with H <sub>2</sub> O <sub>2</sub> solution..... | <b>Fig. S13-14</b> |

---

<sup>a</sup> School of Physical Science and Technology, ShanghaiTech University, Shanghai, China.

Email: [caokch@shanghaitech.edu.cn](mailto:caokch@shanghaitech.edu.cn); [liupx@shanghaitech.edu.cn](mailto:liupx@shanghaitech.edu.cn)

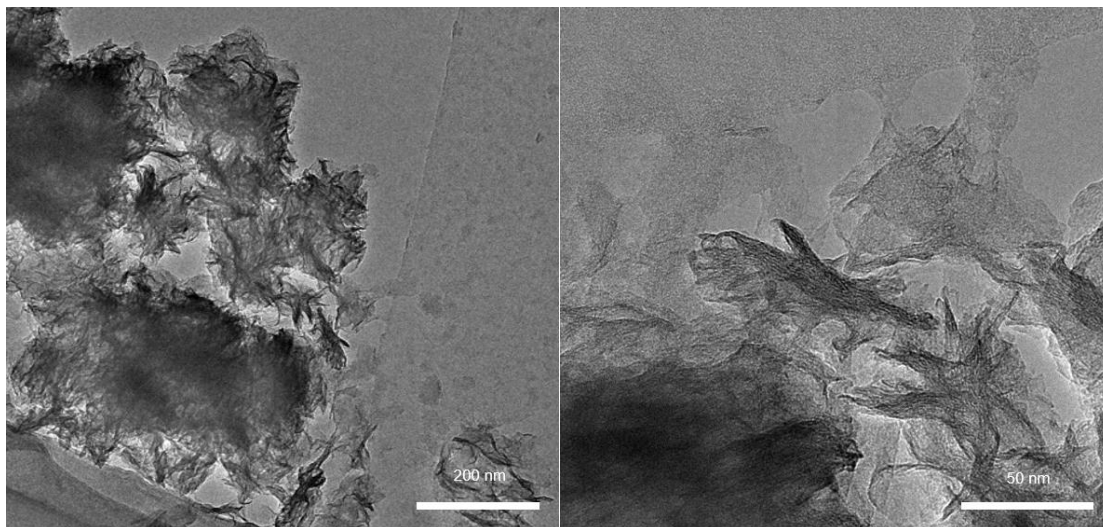

**Fig. S1** Representative TEM images of the  $\text{TiO}_2(\text{B})$  nanosheets precursor.

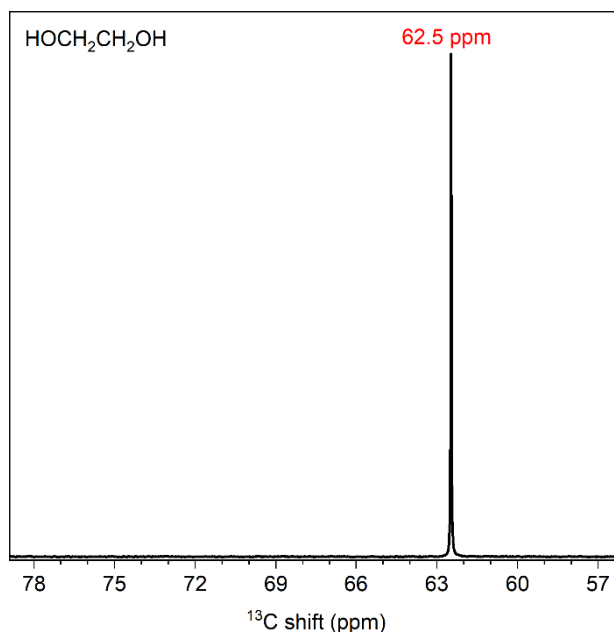

**Fig. S2**  $^{13}\text{C}$  ss-NMR of EG shows a singlet peak at 62.5 ppm, lower than the  $^{13}\text{C}$  ss-NMR of  $\text{TiO}_2(\text{B})$  nanosheets, which indicates a different chemical environment.

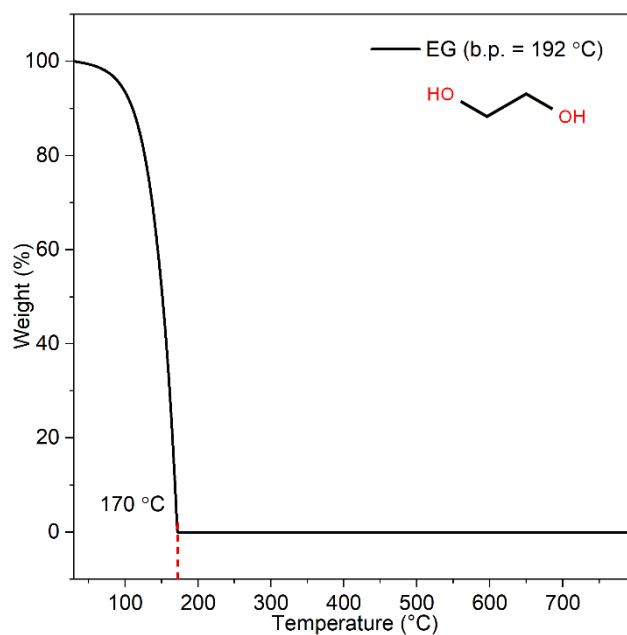

**Fig. S3** TGA curve of free EG. In air flow, free EG completely evaporated at temperature lower than its boiling point.

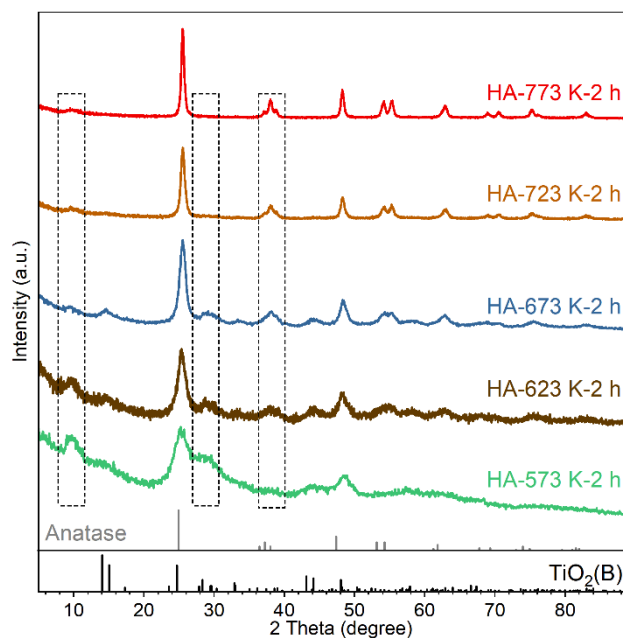

**Fig. S4** XRD patterns of calcined TiO<sub>2</sub>(B) nanosheets at different temperatures for 2 hours. The phase transition was completed at 773 K.

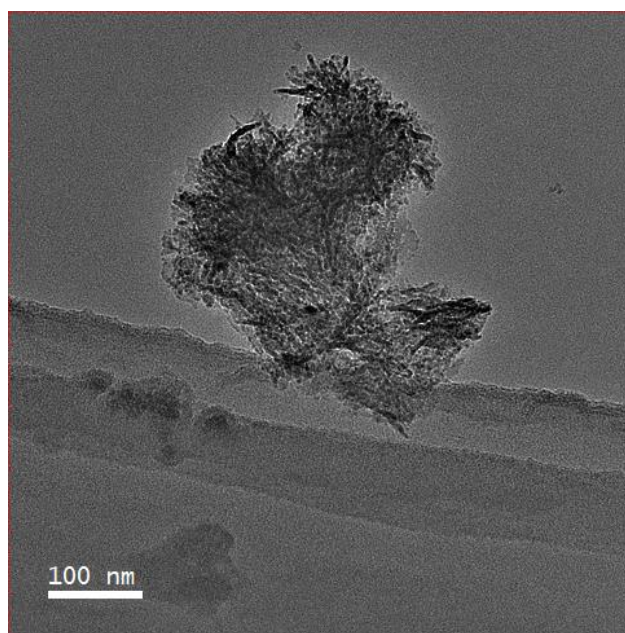

**Fig. S5** Representative TEM image of HA-773 K-2 h.

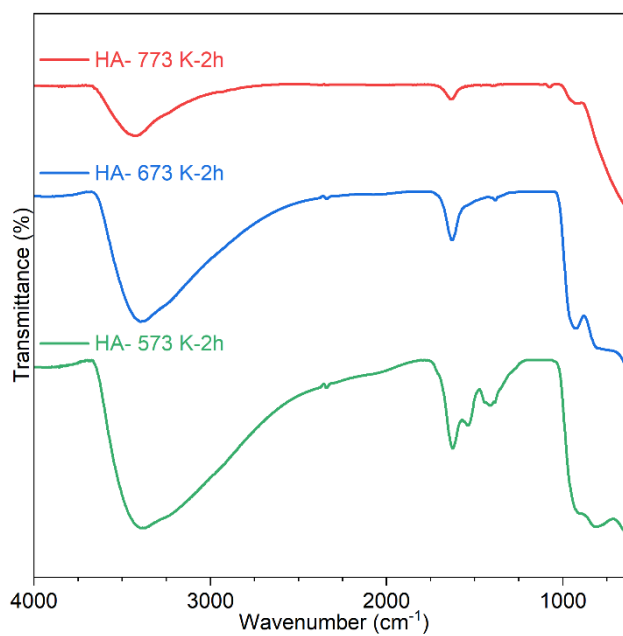

**Fig. S6** FT-IR spectra of samples obtained after heat treatment in air at 573 K, 673 K, 776 K for 2 hours. As the temperature increased, the amount of EG ligand residue decreased, proved by the loss of intensities of peaks at 2932, 2872, 1080  $\text{cm}^{-1}$ .

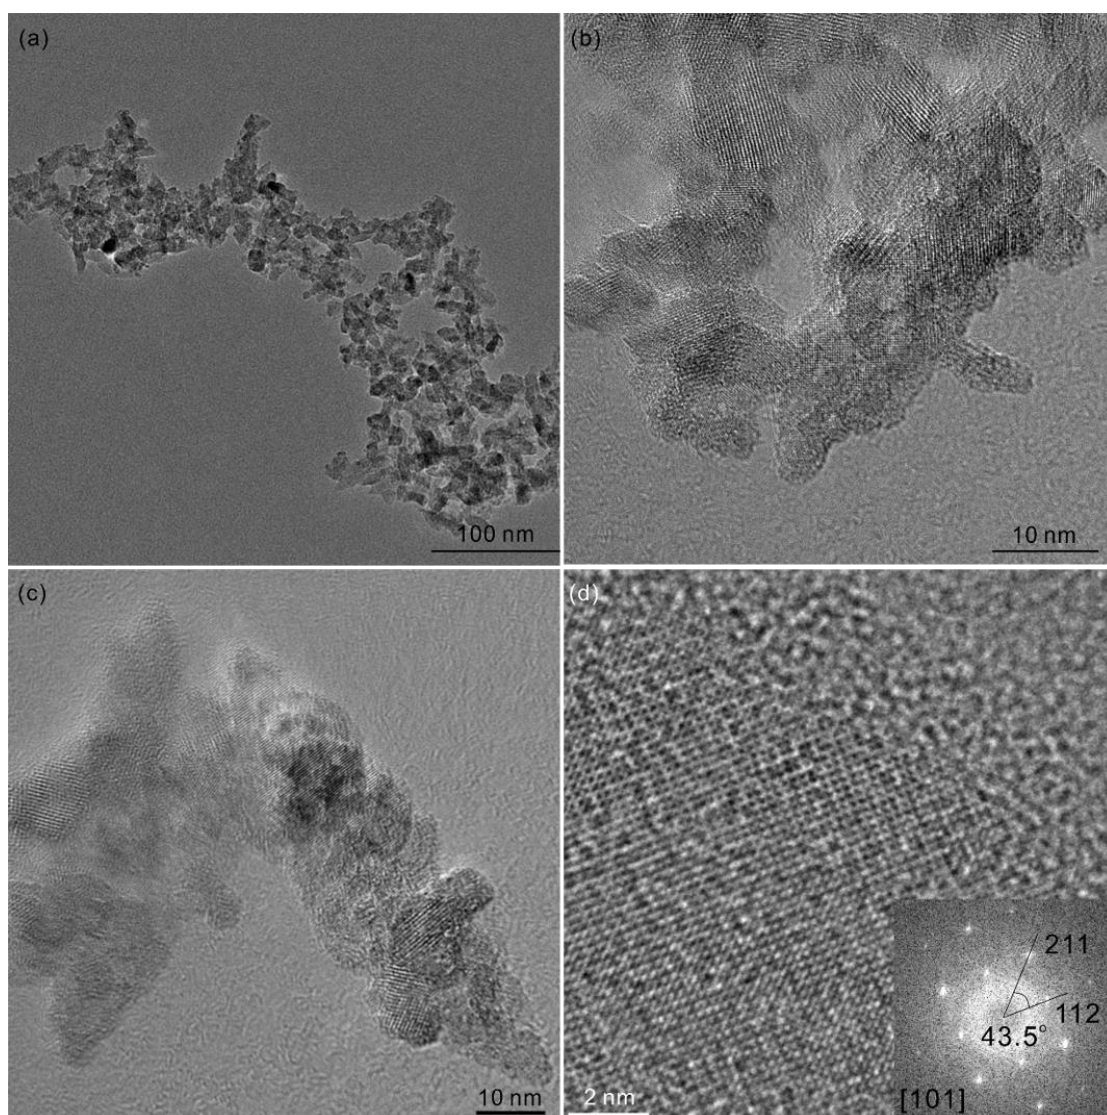

**Fig. S7** (a) TEM image and (b, c, d) HRTEM images of HW-373 K-3 h, inset of (d) is the FFT result of the HRTEM image.

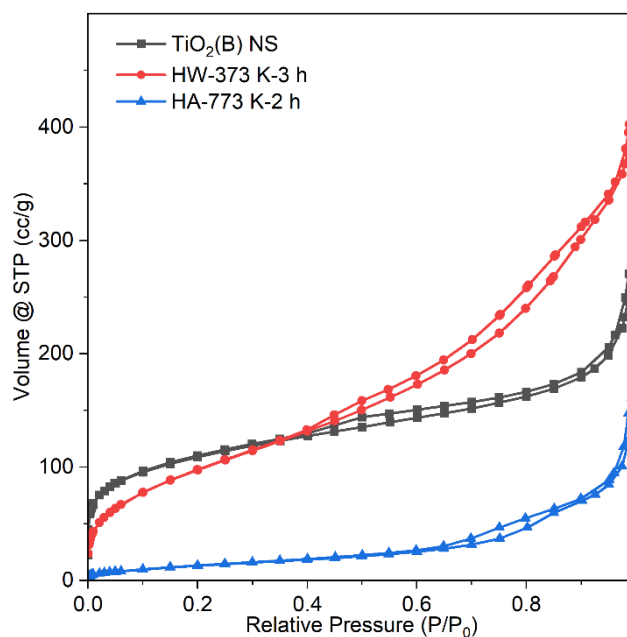

**Fig. S8** BET curves of  $\text{TiO}_2(\text{B})$  nanosheets, sample obtained after heating in water at 373K for 3 hours and sample obtained after heating in the air at 773K for 2 hours. Their specific surface area was 341.5  $\text{m}^2/\text{g}$ , 214.9  $\text{m}^2/\text{g}$  and 53.2  $\text{m}^2/\text{g}$ , respectively.

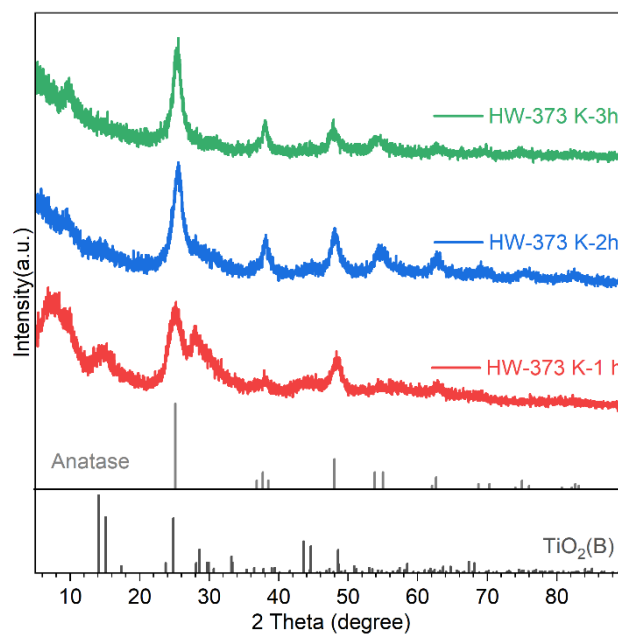

**Fig. S9** XRD patterns of samples obtained after heating  $\text{TiO}_2(\text{B})$  nanosheets in water at 373K for 1, 2, 3 hours, respectively. The decreased intensity of peaks at 28.6° and the increased intensity of peaks at 38.1° indicated the phase transition.

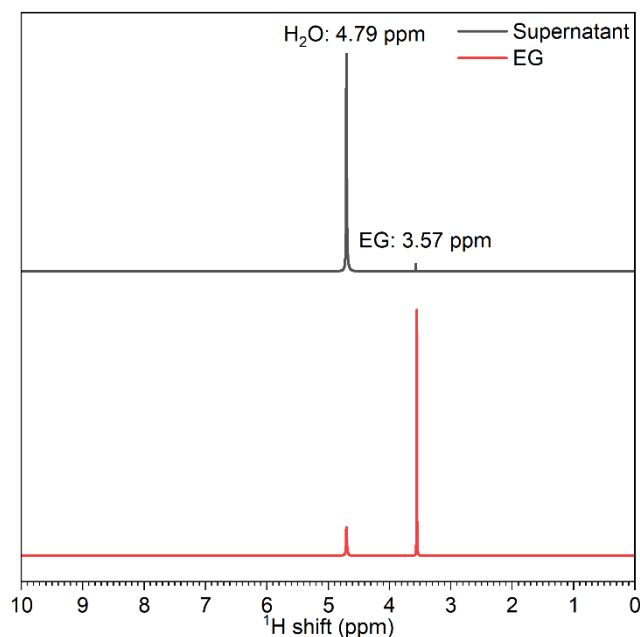

**Fig. S10** NMR of supernatant after heating TiO<sub>2</sub>(B) nanosheets in water, in comparison with the NMR of free EG, which proves that free EG is formed and released into the water phase from the material.

<sup>1</sup>H NMR spectra were recorded on Bruker 500 MHz with 5 mm NMR tube and D<sub>2</sub>O as solvent. <sup>1</sup>H chemical shifts were referenced to water at 4.79 ppm. Ethylene glycol was measured by 64 scans while supernatant was 128 scans.

**Table S1 Quantification of surface ligands.** *m* stands for the initial mass of materials for TGA, while *WL* stands for mass change in the 220 -450 °C range. *S* stands for surface area.  $\Delta S$  stands for the differences of the initial surface area and the surface area of corresponding calcined samples at 450 °C.

| Sample       | <i>m</i> /mg | <i>WL</i> /mg | <i>S</i> /m <sup>2</sup> | $\Delta S$ /m <sup>2</sup> | <i>n</i> <sub>-OH</sub> /mmol | <i>n</i> <sub>EG</sub> /mmol |
|--------------|--------------|---------------|--------------------------|----------------------------|-------------------------------|------------------------------|
| Precursor    | 7.028        | 1.632         | 2.400                    | 2.113                      | 0.0374                        | 0.0294                       |
| HW-373 K-1 h | 6.588        | 0.884         | 1.989                    | 1.686                      | 0.062                         | 0.0074                       |
| HW-373 K-2 h | 10.026       | 0.909         | 2.449                    | 1.964                      | 0.0815                        | 0.0040                       |
| HW-373 K-3 h | 7.061        | 0.479         | 1.517                    | 1.167                      | 0.0532                        | 0                            |

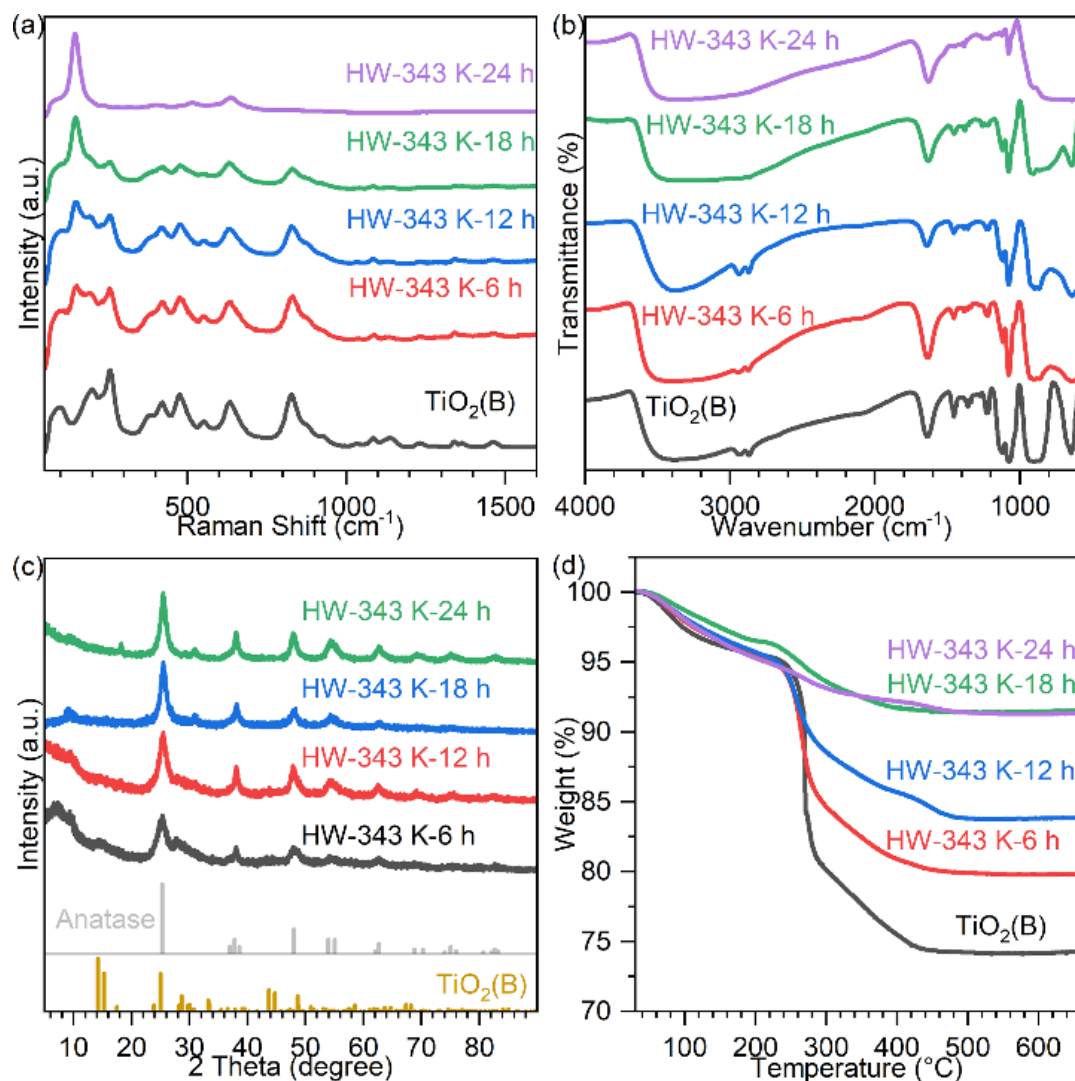

**Fig. S11** (a) Raman, (b) FT-IR spectra, (c) XRD and (d) TGA results of time-tracking experiments by heating TiO<sub>2</sub>(B) nanosheets in water at 343K for 6, 12, 18, 24 hours.



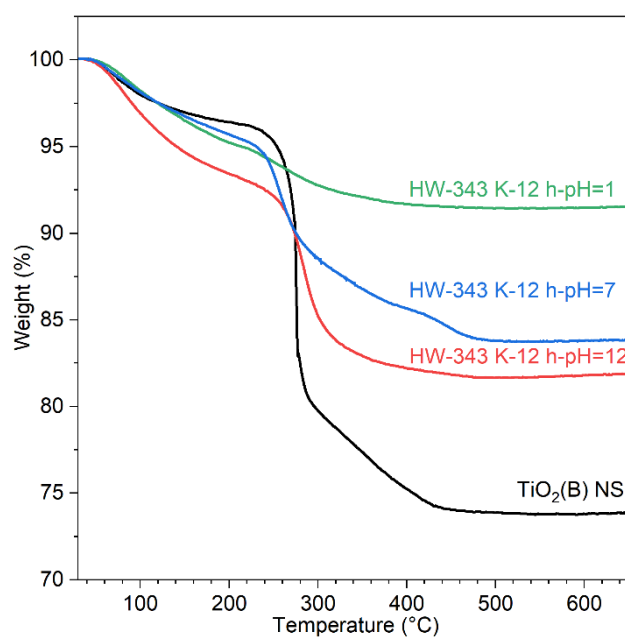

**Fig. S12** TGA results of samples obtained after heating TiO<sub>2</sub>(B) nanosheets in water at 343 K with pH = 1, 7, 12.

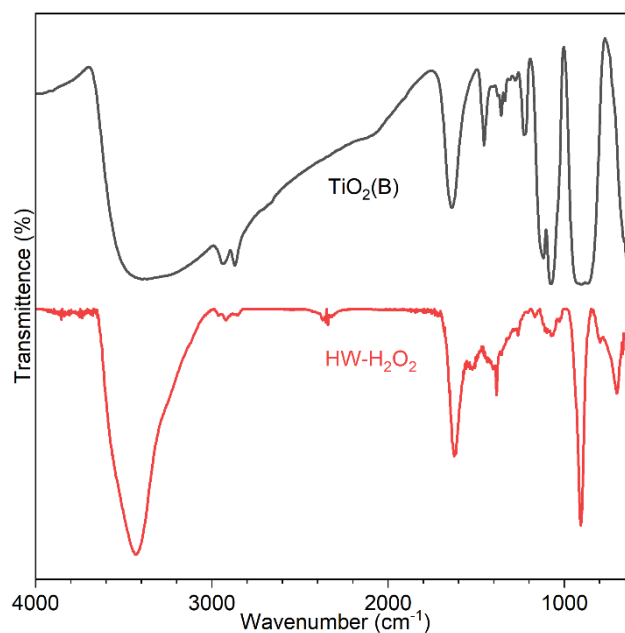

**Fig. S13** FT-IR spectra of samples obtained after H<sub>2</sub>O<sub>2</sub> treatment. The decreased peaks at 2932, 2872, 1080 cm<sup>-1</sup> proves that EG ligands are partly removed from the surface of the TiO<sub>2</sub>(B) nanosheets.

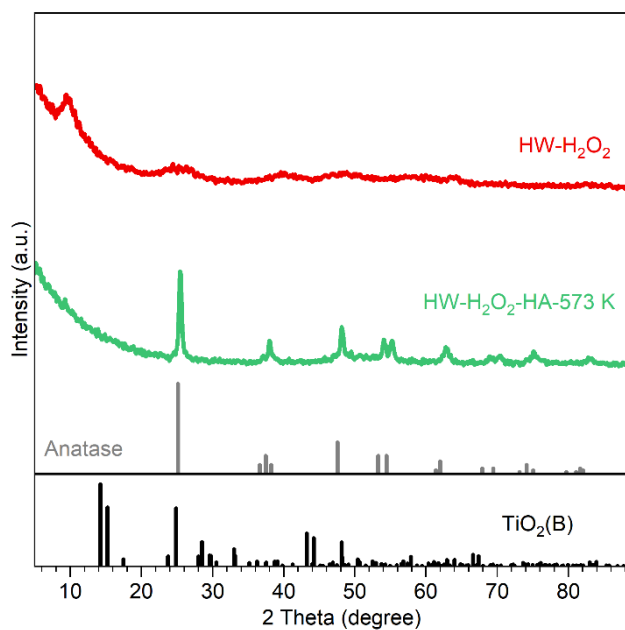

**Fig. S14** XRD patterns of sample pretreated with H<sub>2</sub>O<sub>2</sub> and the corresponding calcined sample. After treated with H<sub>2</sub>O<sub>2</sub> for 12 hours, the TiO<sub>2</sub>(B) nanosheets became amorphous and converted to well crystallized anatase after heated in the air at 573 K for 2 hours. Without H<sub>2</sub>O<sub>2</sub> pretreatment, HA-573 K-2 h was not fully converted into anatase (see **Fig. S4**).
